# Supplementary material
Source: PubMed Central journal article supplement (PMC5365143)

Figure S1

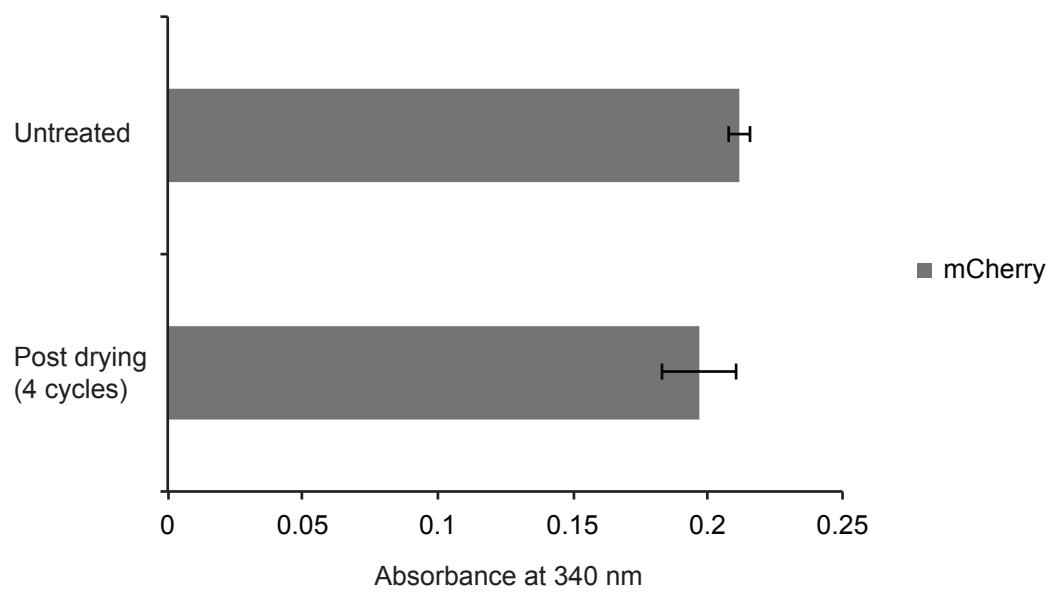

Supplement: NIHMS71886-supplement-Supplementary_Information.pdf [file NIHMS71886-supplement-Supplementary_Information.pdf]
